# Supplementary material
Source: Springer Nature journal article supplement (https://www.springermedizin.de/resource/supplementary/12936_2012_2146_MOESM1_ESM.pdf/9542668)
Supplement: MOESM1 [file 9542668]

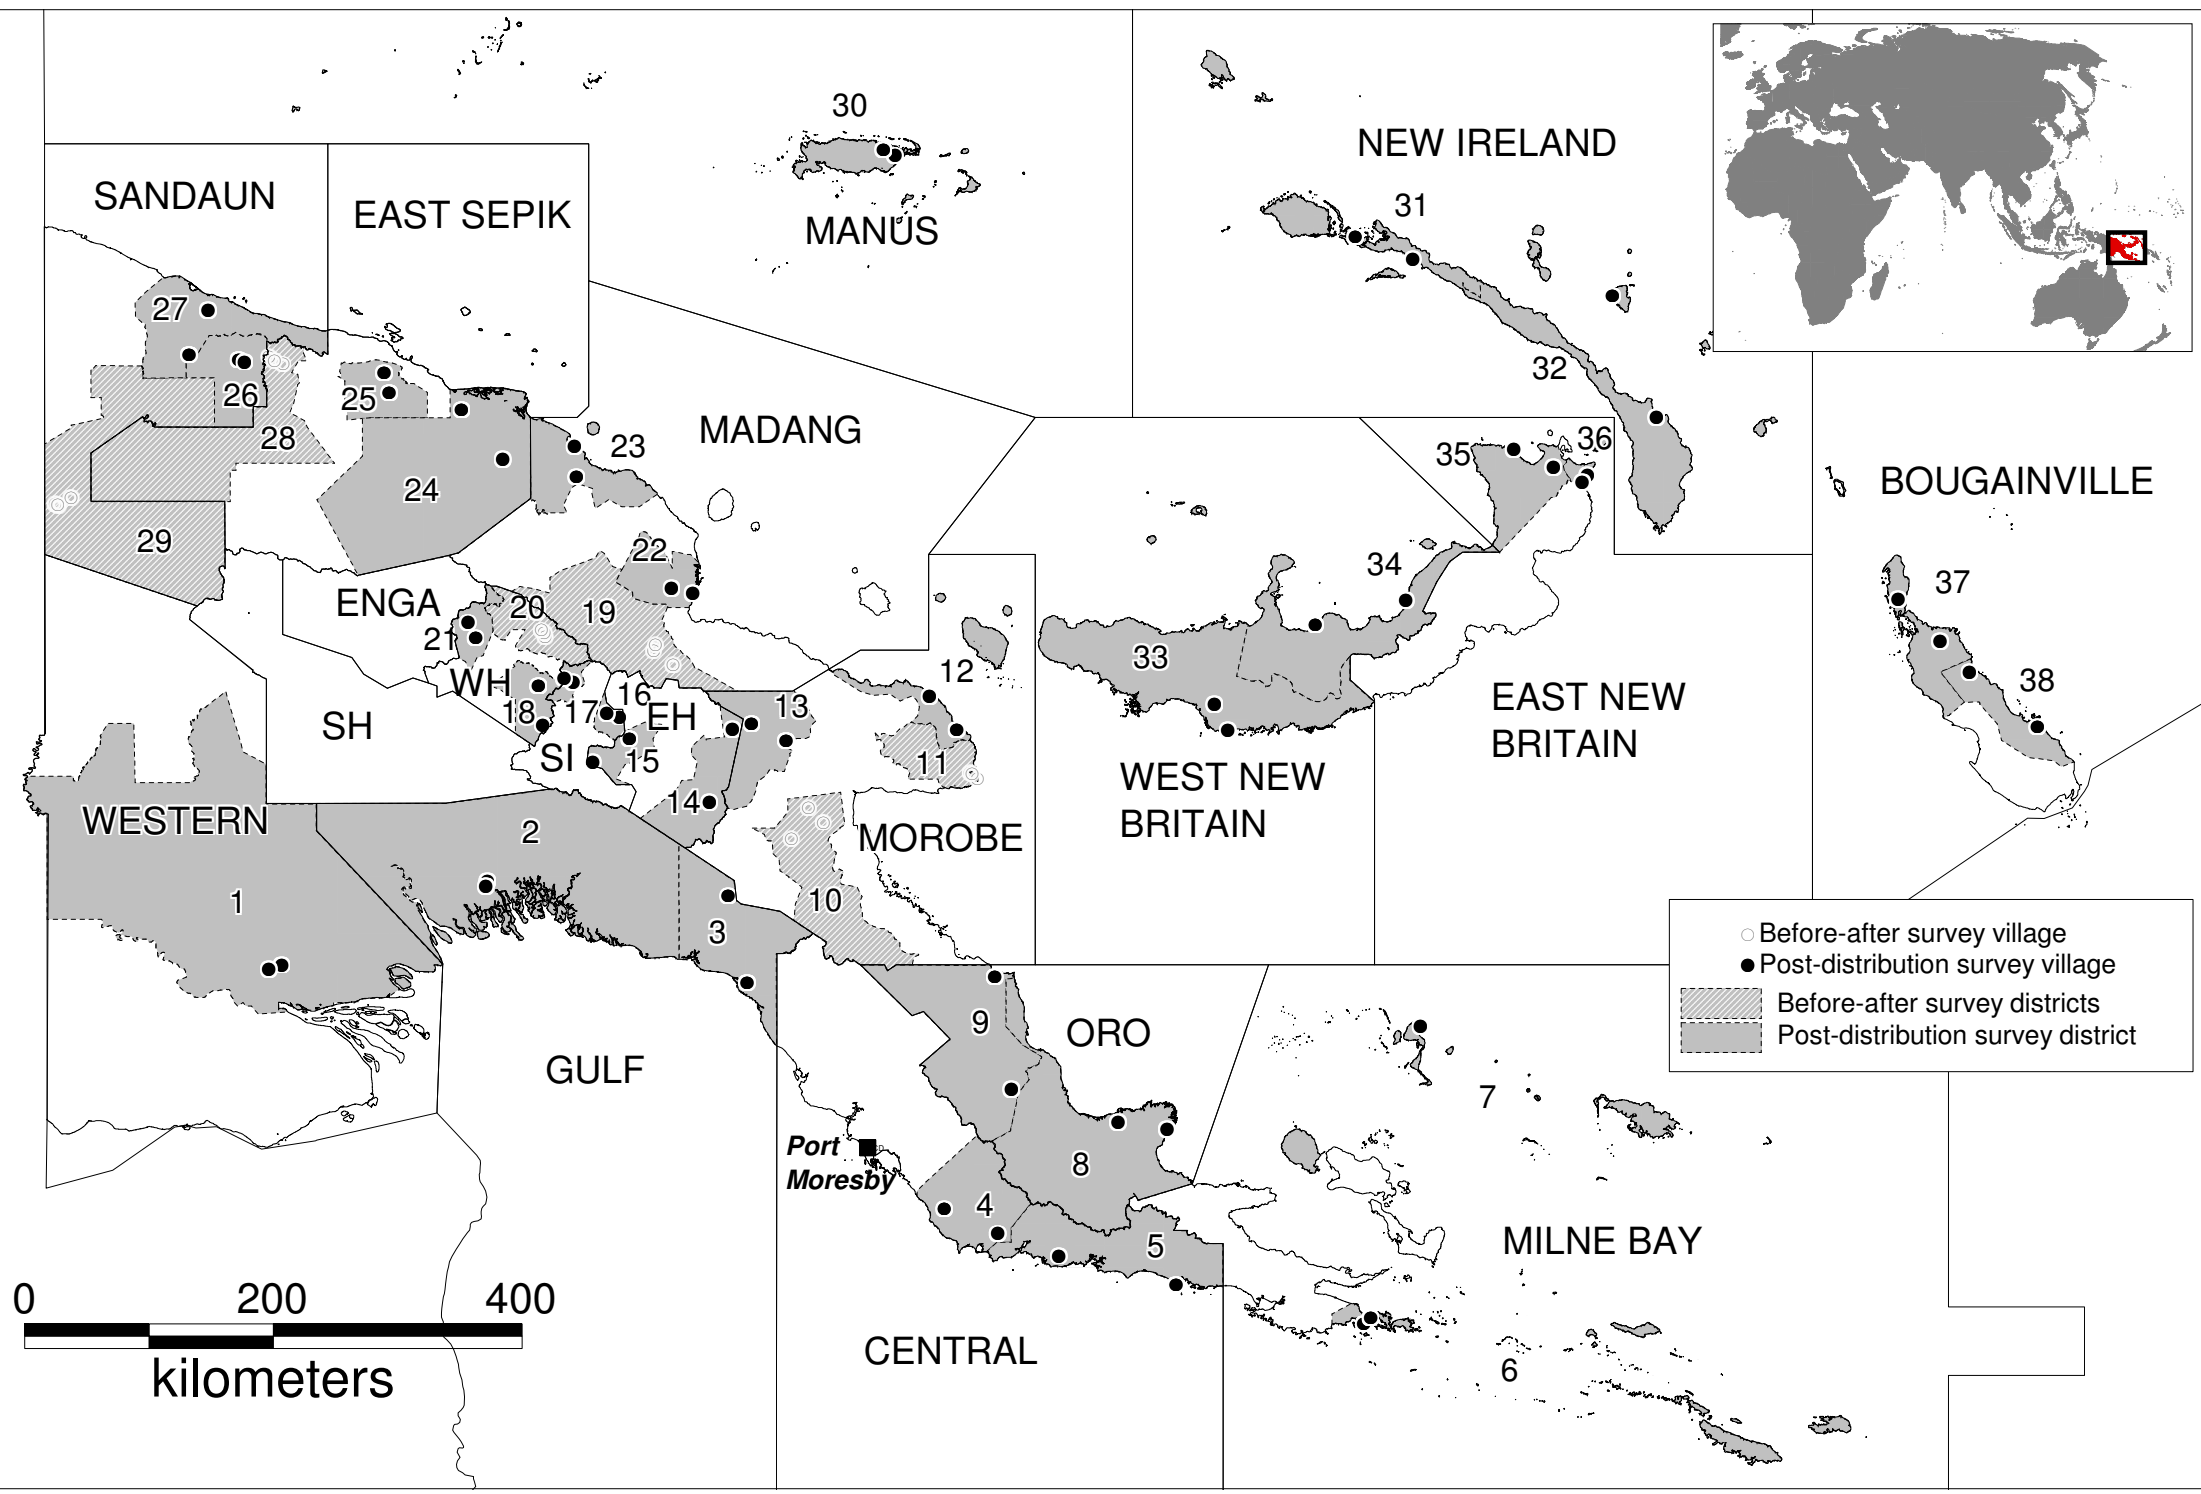

- Before-after survey village
- Post-distribution survey village
- ▨ Before-after survey districts
- Post-distribution survey district

0 200 400  
kilometers

Port Moresby

NEW IRELAND

BOUGAINVILLE

EAST NEW BRITAIN

WEST NEW BRITAIN

ORO

MILNE BAY

CENTRAL

SANDAUN

EAST SEPIK

MANUS

MADANG

ENGA

WESTERN

SH

WH

SI

EH

MOROBE

GULF

kilometers
